# Supplementary material for: The gaps and challenges in digital health technology use as perceived by patients: a scoping review and narrative meta-synthesis
Source: Front Digit Health. 2025 Mar 27;7:1474956. doi: 10.3389/fdgth.2025.1474956 (PMC11983460; doi:10.3389/fdgth.2025.1474956)
Supplement: Supplementary file 1 [file Table1.xlsx]

## Sheet: Φύλλο1
No	TITLE	AUTHORS	YEAR	Study Design and Methodology	Data Collection Methods	Analysis and Interpretation	Relevance to Review Objectives
1	Client perceptions of the mental health engagement network: a qualitative analysis of an electronic personal health record	Forchuk et al.	2015	YES	NO	NO	YES
2	Managing diabetes in the digital age	Viral N. Shah et al.	2015	YES	NO	NO	YES
3	Understanding factors affecting patient and public engagement and recruitment to digital health interventions: a systematic review of qualitative studies	O’Connor et al.	2016	YES	YES	YES	YES
4	The Electronic Patient Reported Outcome Tool: Testing Usability and Feasibility of a Mobile App and Portal to Support Care for Patients With Complex Chronic Disease and Disability in Primary Care Settings	Carolyn Steele Gray et al.	2016	YES	YES	YES	YES
5	eHealth Development in Selected EU Countries: Barriers and Opportunities	Marcin Kautsch et al.	2016	YES	NO	NO	YES
6	Usability and eHealth Literacy Evaluation of a Mobile Health Application Prototype to Track Diagnostic Imaging Examinations...ITCH 2017	Griffith et al.	2017	YES	NO	NO	YES
7	Personal Health Records: A Systematic Literature Review	Roehrs et al.	2017	YES	YES	NO	YES
8	Lack of Adoption of a Mobile App to Support Patient Self-Management of Diabetes and Hypertension in a Federally Qualified Health Center: Interview Analysis of Staff and Patients in a Failed Randomized Trial	Kathleen Thies et al.	2017	YES	NO	NO	YES
9	Improving the Patient-Clinician Interface of Clinical Trials through Health Informatics Technologies.	Jake Carrion	2018	YES	NO	NO	YES
10	A Research Roadmap: Connected Health as an Enabler of Cancer Patient Support	Signorelli et al.	2019	YES	NO	NO	YES
11	Selecting Mobile Health Technologies for Electronic Health Record Integration: Case Study.	Shaw et al.	2020	YES	NO	NO	YES
12	The Current State of Research, Challenges, and Future Research Directions of Blockchain Technology in Patient Care: Systematic Review.	Durneva et al.	2020	YES	YES	YES	YES
13	Wearable sensors with possibilities for data exchange: Analyzing status and needs of different actors in mobile health monitoring systems.	Muzny et al.	2020	YES	YES	YES	YES
14	Impact of mobile health and medical applications on clinical practice in gastroenterology	Kernebeck et al.	2020	NO	NO	NO	YES
15	Barriers to and Facilitators of the Prescription of mHealth Apps in Australian General Practice: Qualitative Study	Byambasuren et al.	2020	YES	NO	YES	YES
16	Patient experiences with technology enabled care across healthcare settings- a systematic review	Ann-Chatrin Linqvist Leonardsen et al.	2020	YES	YES	YES	YES
17	Digital Health for Patients With Multiple Myeloma: An Unmet Need	Jagannath et al.	2021	NO	NO	YES	YES
18	Attitudes of General Practitioners Toward Prescription of mobile health apps: Qualitative study	Aline Saraddon-Eck et al.	2021	YES	NO	YES	YES
19	Integrating patient perspectives in the development of a mobile health intervention to address chronic pain and heavy drinking in primary care: a qualitative study of patients in an urban, safety-net hospital setting	Tibor P. Palfai et al.	2021	YES	NO	YES	YES
20	Mapping the Role of Digital Health Technologies in Prevention and Control of COVID-19 Pandemic: Review of the Literature	Binyam Tilahun et al.	2021	YES	NO	YES	YES
21	Feasibility and acceptability of electronic administration of patient reported outcomes using mHealth platform in emergency department patients with non-medical opioid use	Kathryn Hawk et al.	2021	YES	NO	NO	YES
22	How Far Can Conversational Agents Contribute to IBD Patient Health Care—A Review of the Literature	Pernencar et al.	2022	YES	NO	YES	YES
23	"It closes the gap when the ball is dropped": patient perspectives of a novel smartphone app for regional care coordination after hospital encounters	Guzman et al.	2022	YES	NO	YES	YES
24	Digital health-enabled genomics: Opportunities and challenges	Bombard et al.	2022	YES	YES	YES	YES
25	Smart Technologies used as Smart Tools in the Management of Cardiovascular Disease and their Future Perspective	Ullah Muneeb et al.	2023	YES	YES	YES	YES
26	Digital health in the era of COVID-19: Reshaping the next generation of healthcare	Getachew Emnet et al.	2023	YES	YES	YES	YES
27	Identifying benefits and concerns with using digital health services during COVID-19: Evidence from a hospital-based patient survey	Annabelle Painter et al.	2023	YES	YES	YES	YES
28	Continuing the quality improvement of an electronic personal health record and interactive website for people with diabetes in Scotland (My Diabetes My Way)	Cathy Shields et al.	2023	YES	YES	YES	YES
