# Supplementary material for: The gaps and challenges in digital health technology use as perceived by patients: a scoping review and narrative meta-synthesis
Source: Front Digit Health. 2025 Mar 27;7:1474956. doi: 10.3389/fdgth.2025.1474956 (PMC11983460; doi:10.3389/fdgth.2025.1474956)
Supplement: Supplementary file 2 [file Table2.xlsx]

## Sheet: Φύλλο1
No	TITLE	AUTHORS	YEAR	TYPE OF STUDY	COUNTRY	TYPE OF TECHNOLOGY	RESEARCH GAP 1. DIGITAL HEALTH LITERACY	RESEARCH GAP 2. FUNCTIONALITY-USABILITY	RESEARCH GAP 3. TRUST	CHALLENGE 1. DIGITAL HEALTH LITERACY	CHALLENGE 2. FUNCTIONALITY-USABILITY	CHALLENGE 3. TRUST
1	Client perceptions of the mental health engagement network: a qualitative analysis of an electronic personal health record	Forchuk et al.	2015	original/primary cohort study	Canada	ELECTRONIC HEALTH RECORD MOBILE HEALTH APPS	X			X	X
2	Managing diabetes in the digital age	Viral N. Shah et al.	2015	Review article	USA	MOBILE HEALTH APPS ELECTRONIC HEALTH RECORD			X		X	X
3	Understanding factors affecting patient and public engagement and recruitment to digital health interventions: a systematic review of qualitative studies	O’Connor et al.	2016	Systematic Review of qualitative studies	UK	ELECTRONIC HEALTH RECORD TELEMEDICINE MOBILE HEALTH APPS	X	X	X	X	X	X
4	The Electronic Patient Reported Outcome Tool: Testing Usability and Feasibility of a Mobile App and Portal to Support Care for Patients With Complex Chronic Disease and Disability in Primary Care Settings	Carolyn Steele Gray et al.	2016	Pilot usability testing	Canada	MOBILE HEALTH APPS					X	X
5	eHealth Development in Selected EU Countries: Barriers and Opportunities	Marcin Kautsch et al.	2016	Qualitative study	Poland	ELECTRONIC HEALTH RECORD TELEMEDICINE	X				X	X
6	Usability and eHealth Literacy Evaluation of a Mobile Health Application Prototype to Track Diagnostic Imaging Examinations...ITCH 2017	Griffith et al.	2017	original methodology study/developing an app prototype	Canada	MOBILE HEALTH APPS	X
7	Personal Health Records: A Systematic Literature Review	Roehrs et al.	2017	Systematic Literature Review	Brazil	ELECTRONIC HEALTH RECORD			X		X	X
8	Lack of Adoption of a Mobile App to Support Patient Self-Management of Diabetes and Hypertension in a Federally Qualified Health Center: Interview Analysis of Staff and Patients in a Failed Randomized Trial	Kathleen Thies et al.	2017	original study	USA	MOBILE HEALTH APPS ELECTRONIC HEALTH RECORD					X	X
9	Improving the Patient-Clinician Interface of Clinical Trials through Health Informatics Technologies.	Jake Carrion	2018	Review Article	United States	ELECTRONIC HEALTH RECORD MOBILE HEALTH APPS TELEMEDICINE			X			X
10	A Research Roadmap: Connected Health as an Enabler of Cancer Patient Support	Signorelli et al.	2019	Review Article	Spain	MOBILE HEALTH APPS WIRELESS MONITORING TECHNOLOGIES TELEMEDICINE ARTIFICIAL INTELLIGENCE BIOFEEDBACK/DIGITAL REHABILITATION TECHNOLOGY		X	X		X	X
11	Selecting Mobile Health Technologies for Electronic Health Record Integration: Case Study.	Shaw et al.	2020	Case report applying the MAST tool for device selection	United States	ELECTRONIC HEALTH RECORD MOBILE HEALTH APPS WIRELESS MONITORING TECHNOLOGIES					X	X
12	The Current State of Research, Challenges, and Future Research Directions of Blockchain Technology in Patient Care: Systematic Review.	Durneva et al.	2020	Systematic Literature Review	United States	ELECTRONIC HEALTH RECORD BLOCKCHAIN TECHNOLOGY WIRELESS MONITORING TECHNOLOGIES TELEMEDICINE			X			X
13	Wearable sensors with possibilities for data exchange: Analyzing status and needs of different actors in mobile health monitoring systems.	Muzny et al.	2020	Review Article	Norway	ELECTRONIC HEALTH RECORD WIRELESS MONITORING TECHNOLOGIES MOBILE HEALTH APPS					X
14	Impact of mobile health and medical applications on clinical practice in gastroenterology	Kernebeck et al.	2020	Review Article	Germany	ELECTRONIC HEALTH RECORD MOBILE HEALTH APPS TELEMEDICINE DIGITAL BIOMARKERS IN CLINICAL CARE	X	X	X		X	X
15	Barriers to and Facilitators of the Prescription of mHealth Apps in Australian General Practice: Qualitative Study	Byambasuren et al.	2020	Qualitative study	Australia	WIRELESS MONITORING TECHNOLOGIES MOBILE HEALTH APPS		X			X
16	Patient experiences with technology enabled care across healthcare settings- a systematic review	Ann-Chatrin Linqvist Leonardsen et al.	2020	Systematic Review	Norway	TELEMEDICINE		X			X
17	Digital Health for Patients With Multiple Myeloma: An Unmet Need	Jagannath et al.	2021	Review Article	United States	ELECTRONIC HEALTH RECORD TELEMEDICINE MOBILE HEALTH APPS	X	X	X		X
18	Attitudes of General Practitioners Toward Prescription of mobile health apps: Qualitative study	Aline Saraddon-Eck et al.	2021	Qualitative study	France	MOBILE HEALTH APPS					X	X
19	Integrating patient perspectives in the development of a mobile health intervention to address chronic pain and heavy drinking in primary care: a qualitative study of patients in an urban, safety-net hospital setting	Tibor P. Palfai et al.	2021	Qualitative study	USA	MOBILE HEALTH APPS	X		X		X	X
20	Mapping the Role of Digital Health Technologies in Prevention and Control of COVID-19 Pandemic: Review of the Literature	Binyam Tilahun et al.	2021	Literature Review	Ethiopia	TELEMEDICINE ELECTRONIC HEALTH RECORD ARTIFICIAL INTELLIGENCE MOBILE HEALTH APPS					X	X
21	Feasibility and acceptability of electronic administration of patient reported outcomes using mHealth platform in emergency department patients with non-medical opioid use	Kathryn Hawk et al.	2021	original study	USA	MOBILE HEALTH APPS ELECTRONIC HEALTH RECORD					X
22	How Far Can Conversational Agents Contribute to IBD Patient Health Care—A Review of the Literature	Pernencar et al.	2022	Literature Review article	Portugal	ELECTRONIC HEALTH RECORD MOBILE HEALTH APPS ARTIFICIAL INTELLIGENCE					X	X
23	"It closes the gap when the ball is dropped": patient perspectives of a novel smartphone app for regional care coordination after hospital encounters	Guzman et al.	2022	original cohort study	United States	MOBILE HEALTH APPS ELECTRONIC HEALTH RECORD					X	X
24	Digital health-enabled genomics: Opportunities and challenges	Bombard et al.	2022	review of existing technologies	Canada	ELECTRONIC HEALTH RECORD ARTIFICIAL INTELLIGENCE		X			X
25	Smart Technologies used as Smart Tools in the Management of Cardiovascular Disease and their Future Perspective	Ullah Muneeb et al.	2023	Review article	Pakistan	ELECTRONIC HEALTH RECORD MOBILE HEALTH APPS ARTIFICIAL INTELLIGENCE WIRELESS MONITORING SYSTEMS		X	X	X	X	X
26	Digital health in the era of COVID-19: Reshaping the next generation of healthcare	Getachew Emnet et al.	2023	Opinion article	Ethiopia	ELECTRONIC HEALTH RECORD MOBILE HEALTH APPS TELEMEDICINE	X				X
27	Identifying benefits and concerns with using digital health services during COVID-19: Evidence from a hospital-based patient survey	Annabelle Painter et al.	2023	Cross-sectional survey	UK	ELECTRONIC HEALTH RECORD MOBILE HEALTH APPS		X		X	X	X
28	Continuing the quality improvement of an electronic personal health record and interactive website for people with diabetes in Scotland (My Diabetes My Way)	Cathy Shields et al.	2023	Cross-sectional survey	UK	ELECTRONIC HEALTH RECORD MOBILE HEALTH APPS	X				X	X
